# Supplementary material
Source: Royal Society of Chemistry journal article supplement (doi:10.1039/d5tb02518d)
Supplement: d5tb02518d1.pdf [file d5tb02518d1.pdf]

## SUPPLEMENTARY INFORMATION

### Rational design of microfluidic templated HA-LPEI nanogels for the targeted delivery of doxorubicin

Emanuele Limiti<sup>a,b†</sup>, Eleonora D'Alessandro<sup>a†</sup>, Alessio Bucciarelli<sup>c</sup>, Sofia Raniolo<sup>a</sup>, Pamela Mozetic<sup>b,d,e</sup>, Elisa De Luca<sup>b,e</sup>, Enrico Domenico Lemma<sup>a,b</sup>, Francesco Basoli<sup>a</sup>, Giuseppe Gigli<sup>b,f</sup>, Fabio Pizzetti<sup>g</sup>, Emanuele Mauri<sup>g</sup>, Filippo Rossi<sup>g</sup>, Marcella Trombetta<sup>a</sup>, Sara Maria Giannitelli<sup>a\*</sup>, Alberto Raineri<sup>a,b,h\*\*</sup>

<sup>a</sup> Department of Engineering, Università Campus Bio-Medico di Roma, via Álvaro del Portillo 21, 00128 Rome, Italy

<sup>b</sup> Institute of Nanotechnology (NANOTEC), National Research Council, via Monteroni, 73100 Lecce, Italy

<sup>c</sup> BIOtech Research Center and European Institute of Excellence on Tissue Engineering and Regenerative Medicine, Department of Industrial Engineering, University of Trento, Via Delle Regole 101, Trento 38123, Italy

<sup>d</sup> Department of Life Science, Health, and Health Professions, Link Campus University, Rome, Italy

<sup>e</sup> Tecnomed Puglia - Tecnopolo per la medicina di precisione (Biotech Lecce Hub) c/o Campus Ecotekne, via Monteroni, Lecce, 73100 Italy

<sup>f</sup> Department of Experimental Medicine, Università del Salento, via Monteroni, 73100 Lecce, Italy

<sup>g</sup> Department of Chemistry, Materials and Chemical Engineering "G. Natta", Politecnico di Milano, via L. Mancinelli 7, 20131 Milan, Italy

<sup>h</sup> Fondazione Policlinico Universitario Campus Bio-Medico di Roma, via Álvaro del Portillo 200, 00128 Rome, Italy.

#### Synthesis of Rhodamine azide (RhB-N<sub>3</sub>)

Azido terminated-Rhodamine B was synthesized by the following method<sup>46</sup>: 4-azidobutanol spacer was obtained by dissolving 4-chloro-1-butanol (1.5 mL, 15 mmol) in 20 mL of dimethylformamide (DMF) and adding sodium azide (1.17 mg, 18 mmol) at room temperature (RT). The reaction mixture was refluxed at 90 °C for 12 h. Vacuum filtration was used to remove insoluble by-products, and the solution was concentrated under reduced pressure. Residue was re-dissolved in 100 mL of dichloromethane (DCM) and washed with distilled water (DIW) (3 x 100 mL). To remove excess water, the organic phase was dried over magnesium sulfate and filtered using filter paper. Then, the solution was allowed to evaporate at RT to collect the final compound.

Later, the synthesized 4-azidobutanol was reacted with Rhodamine B to obtain RhB-N<sub>3</sub>. Briefly: 4-azidobutanol (200 mg, 1.73 mmol) and rhodamine B (504 mg, 1.05 mmol) were dissolved in 20 mL of DCM. Successively, 1-ethyl-3-(3-dimethylaminopropyl) carbodiimide hydrochloride (EDC, 241.5 mg, 1.26 mmol) and 4-(dimethylamino) pyridine (DMAP, 154 mg, 1.26 mmol) were added to the mixture, which was allowed to stir for 24 h at RT. Additionally, consecutive washes with 1 M HCl (3 x 10 mL), 1 M NaHCO<sub>3</sub> (3 x 10 mL), and supersaturated NaCl (3 x 10 mL) solutions were

performed. The resulting organic phase was dried over anhydrous sodium sulfate and concentrated under vacuum. Residue was dissolved in tetrahydrofuran (THF) (5 mL), then RhB-N<sub>3</sub> was precipitated by adding diethyl ether (20 mL), collected by vacuum filtration, and dried under reduced pressure. At the end, the final sample was stored at +4 °C until use.

### DOX standard calibration curve

A calibration solution of DOX in PBS was prepared by a two-fold dilution (down to 0.02  $\mu\text{M}$ ) starting from a DOX concentration of 5  $\mu\text{M}$ . Fluorescence measurements ( $\lambda_{\text{ex}} = 488 \text{ nm}$ ;  $\lambda_{\text{em}} = 590 \text{ nm}$ ) were recorded on a TECAN M200 spectrophotometer. A standard calibration curve was obtained by plotting fluorescence levels against drug concentration. The linear fitting of the experimental data demonstrated an excellent fit, with an  $R^2$  value of 0.999.

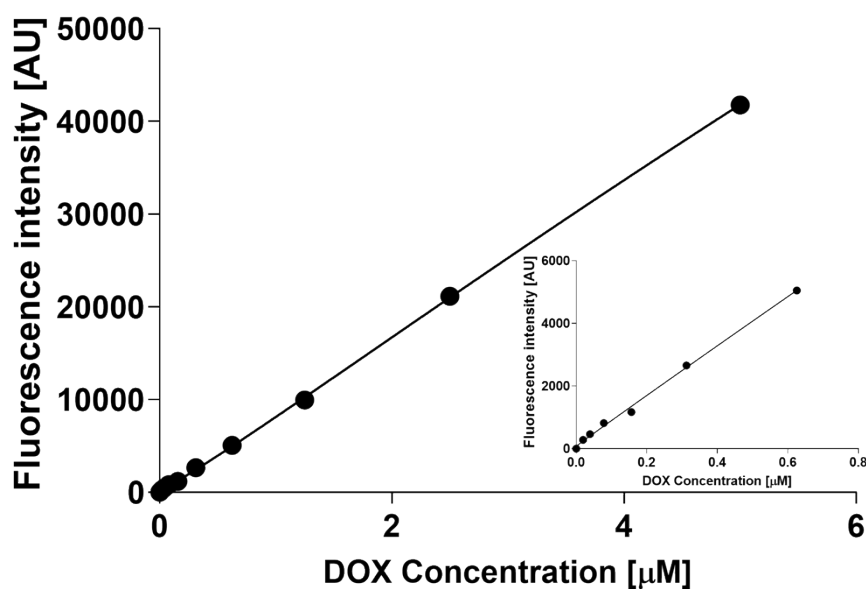

*Figure S1 DOX standard calibration curve.*

## Dose-Response curve of DOX

Figure S2 showed the dose-response curve of DOX evaluated at 24 h on OVCA433 cultured in adhesion using the MTT assay. The value of 4.98  $\mu\text{M}$  was identified as the  $\text{IC}_{50}$  level. The sublethal concentration of 1  $\mu\text{M}$  used in our work is shown by the black dashed line.

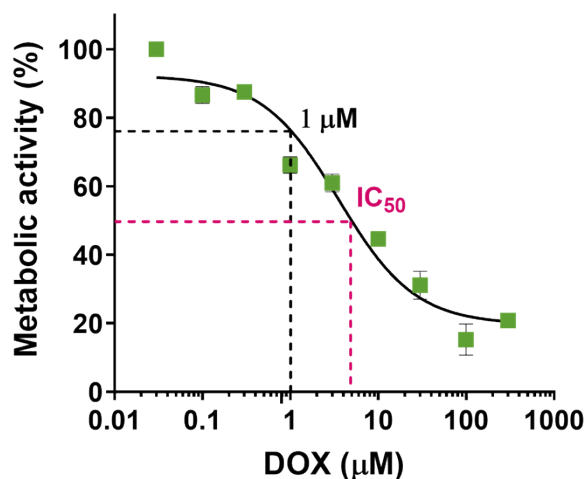

Figure S2 DOX Dose-Response curve.  $\text{IC}_{50}$  level (purple dashed line) and the used sublethal DOX concentration of 1  $\mu\text{M}$  (black dashed line) are highlighted.

## $^1\text{H}$ -NMR spectra

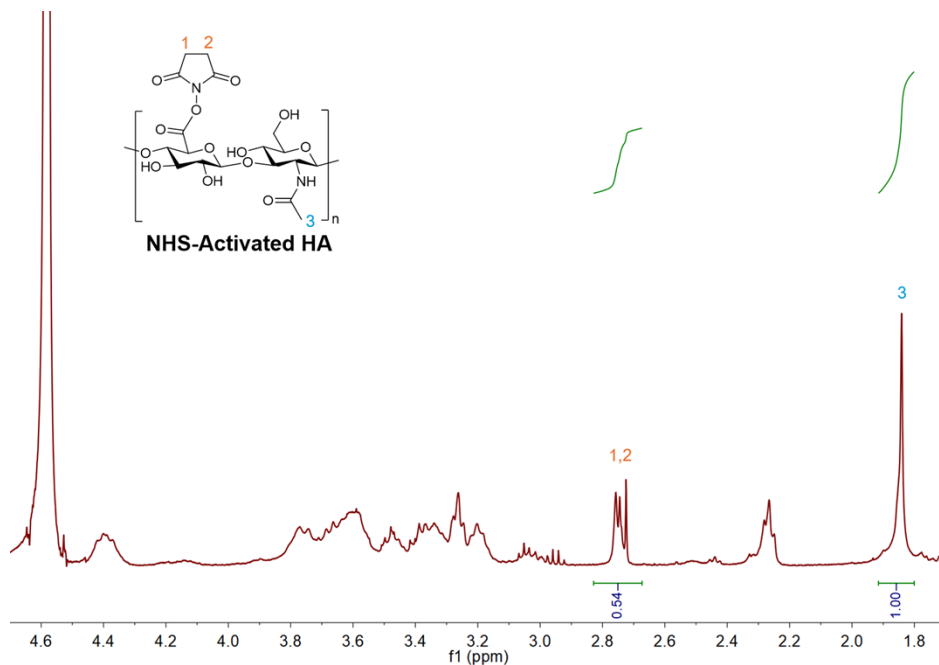

Figure S3  $^1\text{H}$ -NMR spectrum of NHS-Activated HA.

The degree of functionalization (DoF) was determined by calculating the ratio of the succinimide signal at 2.75 ppm to the acetyl methyl protons of hyaluronic acid at 1.84 ppm, yielding an estimated DoF of approximately 40.5%.

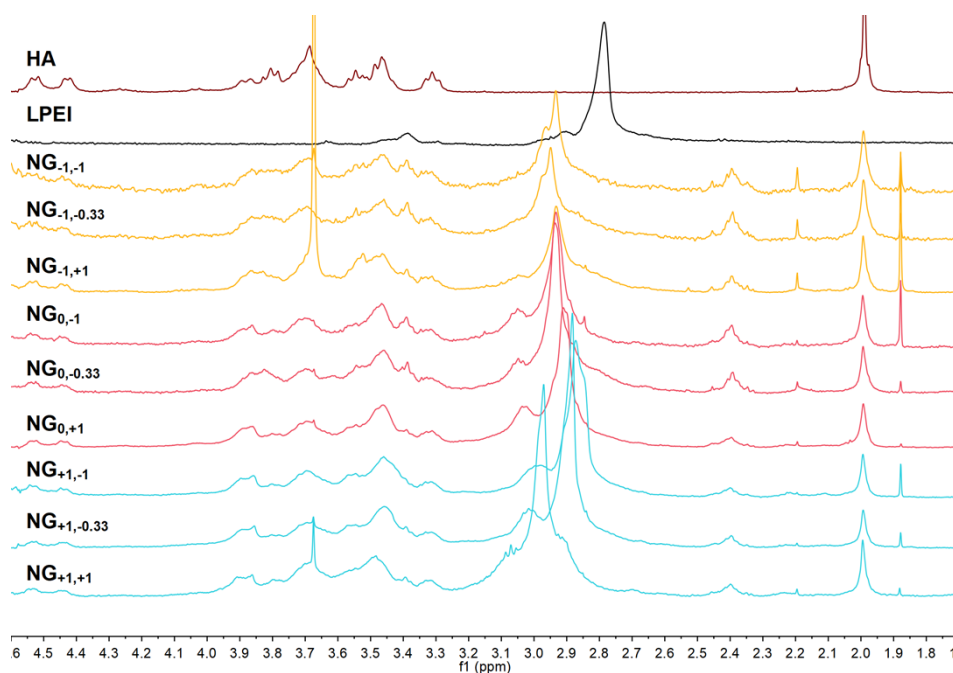

Figure S4  $^1\text{H-NMR}$  spectra of each tested synthesis condition. Yellow, red and blue spectra are referred to the NGs synthesized with MR of 5.75, 11.5 and 17.25, respectively.

### FTIR spectra

Fourier Transform Infrared Spectroscopic (FTIR) analysis was performed using an Agilent CARY 630 FTIR spectrophotometer (Agilent Technologies, USA), equipped with the MicroLab Expert FTIR software. The spectra were recorded in air at room temperature using a diamond ATR cell with a resolution of  $4\text{ cm}^{-1}$ .

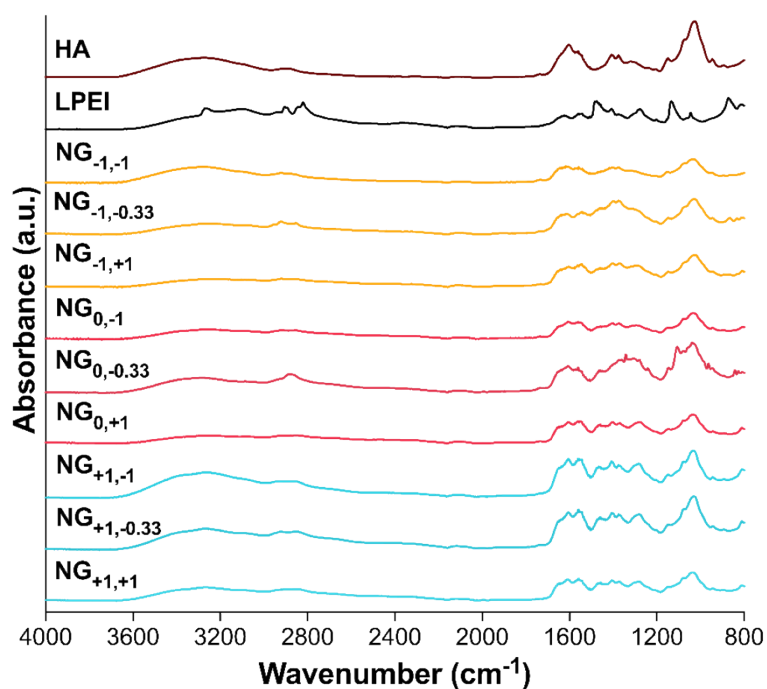

Figure S5 FTIR spectra of each tested synthesis condition. Yellow, red and blue spectra are referred to the NGs synthesized with MR of 5.75, 11.5 and 17.25, respectively.

## TEM

Transmission Electron Microscopy (TEM) analysis was conducted using a FEI Tecnai G2 Microscope (Thermo Fisher Scientific). A suspension of NGs were dropped on a lacey carbon coated 300 mesh copper grid (Agar Scientific, Stansted, UK). Samples were dried at 50 °C and TEM images were collected at an acceleration voltage of 120 kV.

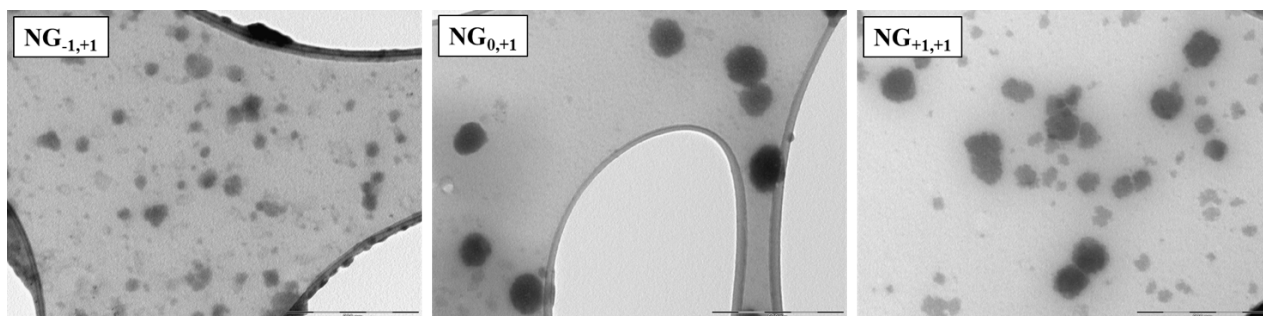

Figure S6 Representative TEM micrographs of three different synthesis condition. Micrographs are referred to the NGs synthesized with FRR = 0.4 and MR 5.75, 11.5 and 17.25, respectively.

## $\zeta$ - potential

The  $\zeta$ -potential of NGs were measured using Zetasizer Nano ZS (Malvern Panalytical). In particular, NGs were suspended in ultrapure water (1 mg/mL) and sonicated for 10 min to ensure minimal aggregation of the colloidal system. Readings were performed in triplicate.

Table S1  $\zeta$ -potential of the synthesized NGs.

| Sample                 | $\zeta$ - potential [mV] |
|------------------------|--------------------------|
| NG <sub>-1,-1</sub>    | -14.2 ± 0.7              |
| NG <sub>-1,-0.33</sub> | -17.3 ± 0.9              |
| NG <sub>-1,+1</sub>    | 1.8 ± 0.2                |
| NG <sub>0,-1</sub>     | 9.4 ± 0.1                |
| NG <sub>0,-0.33</sub>  | 12.3 ± 0.6               |
| NG <sub>0,+1</sub>     | 15.8 ± 0.4               |
| NG <sub>+1,-1</sub>    | 13.5 ± 1.0               |
| NG <sub>+1,-0.33</sub> | 12.2 ± 0.3               |
| NG <sub>+1,+1</sub>    | 21.1 ± 0.4               |

## Drug release

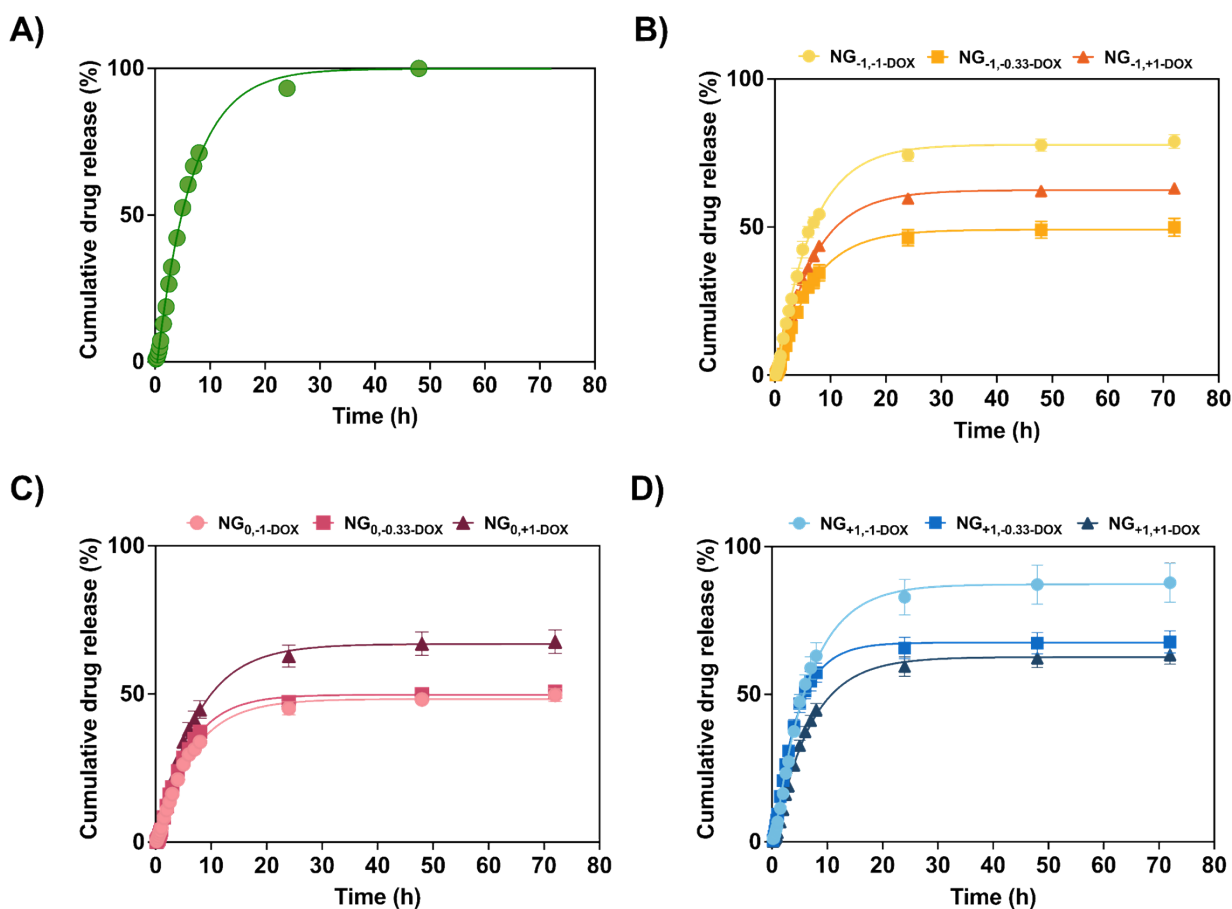

Figure S7 A) Free DOX cumulative release (%). B-D) Drug release curves for NGs synthesized with MR levels of 5.75 (B), 11.5 (C) and 17.25 (D).

From Figure S6 A it is possible to appreciate the slow diffusion of DOX through the dialysis bag. The complete release (100%) was achieved only after 48 hours, indicating that the drug-membrane interactions cannot be considered negligible. This same profile can be observed in the release experiments of the DOX-NGs. However, even if the release kinetics has been hindered by the employed experimental setup, the different plateau levels account for a different behavior between the specimens that can be observed.

## G6PD assay

NGs cytotoxicity was evaluated through G6PD assay. NGs were administered to the OVCA433 cell line following the protocol described in the manuscript. None of the tested formulations showed altered cell viability after 24h, as reported in Figure S7.

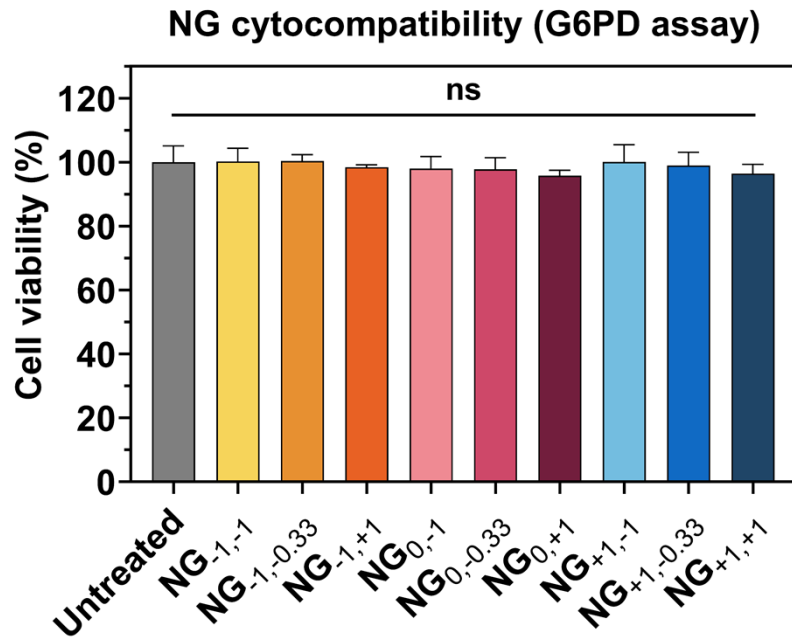

Figure S8 NG cytocompatibility assessed via G6PD assay.

### MTT assay

NGs influence on metabolic activity was evaluated through MTT assay. NGs were administered to the OVCA433 cell line following the protocol described in the manuscript.

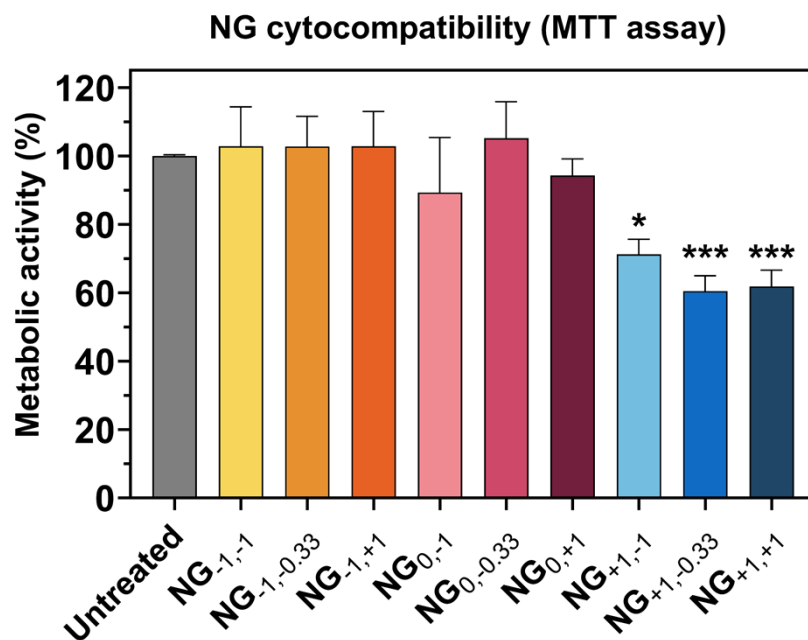

Figure S9 NG cytocompatibility assessed via MTT assay.

## Confocal microscopy

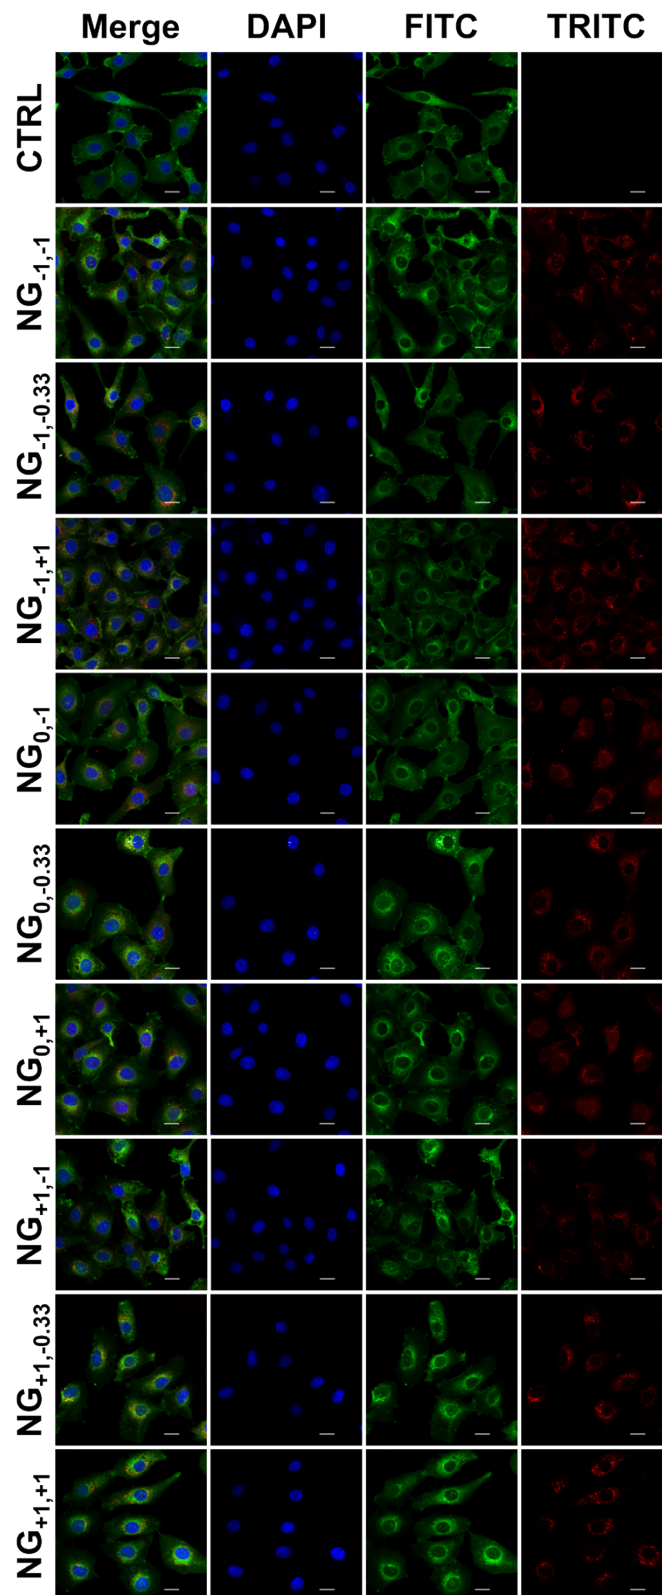

Figure S10 representative fluorescence confocal micrographs. Nuclei are stained with DAPI, cellular membrane with CellMask Green, and red signals are ascribable to the successful NGs internalization. Scale bar 20  $\mu\text{m}$ .

## Calculation of corrective factors for flow cytometry

$$\frac{n_{LPEI}}{n_{HA}}$$

As a first step, the molar ratio  $n_{HA}$  between the repeating units of LPEI and HA has been calculated integrating the respective signals of LPEI and HA in each NG spectrum: from 3.417-3.376 ppm and 3.142-2.587 ppm for LPEI, and 4.59-3.419 ppm and 3.336-3.262 ppm for HA.

$$\frac{m_{LPEI}}{m_{HA}}$$

Successively, we calculated the LPEI/HA weight ratio  $m_{HA}$  by taking into consideration the molecular weight (MW) of their respective repeating units:

$$\frac{m_{LPEI}}{m_{HA}} = \frac{n_{LPEI} \cdot MW_{LPEI}}{n_{HA} \cdot MW_{HA}}$$

As the fluorescent dye is linked to LPEI, the corrective factor (CF) must take into account the different amount of LPEI present in each NGs. Thus, we define the LPEI weight fraction as follows:

$$\frac{m_{LPEI}}{m_{NG}} = \frac{m_{LPEI}}{m_{LPEI} + m_{HA}} = \frac{m_{LPEI}/m_{HA}}{m_{LPEI}/m_{HA} + 1}$$

Given the weight fraction of LPEI in each NG formulation, the corresponding corrective factor was defined as:

$$CF_i = \left( \frac{m_{LPEI}}{m_{NG}} \right)_i^{-1}$$

CFs were further normalized to the lowest value:

$$\bar{CF}_i = \frac{CF_i}{\min\{CF\}}$$

## Empirical model

*Table S2. Variance table for NG cytocompatibility (%)*

| Source                        | Sum of Squares | df | Mean Square | F-value | p-value  |                 |
|-------------------------------|----------------|----|-------------|---------|----------|-----------------|
| <b>Model</b>                  | 9005.82        | 5  | 1801.16     | 85.03   | < 0.0001 | significant     |
| A-Mr                          | 7438.61        | 1  | 7438.61     | 351.16  | < 0.0001 | ***             |
| A <sup>2</sup>                | 1262.35        | 1  | 1262.35     | 59.59   | < 0.0001 | ***             |
| B <sup>2</sup>                | 359.23         | 1  | 359.23      | 16.96   | 0.0005   | ***             |
| A <sup>2</sup> B              | 110.35         | 1  | 110.35      | 5.21    | 0.0330   | *               |
| A <sup>2</sup> B <sup>2</sup> | 497.34         | 1  | 497.34      | 23.48   | < 0.0001 | ***             |
| <b>Residual</b>               | 444.85         | 21 | 21.18       |         |          |                 |
| Lack of Fit                   | 45.11          | 3  | 15.04       | 0.6771  | 0.5773   | not significant |
| Pure Error                    | 399.74         | 18 | 22.21       |         |          |                 |
| <b>Cor Total</b>              | 9450.67        | 26 |             |         |          |                 |

*Table S3. Coefficients table for NG cytocompatibility (%)*

| Factor                        | Coefficient Estimate | df | Standard Error | 95% CI Low | 95% CI High | VIF  |
|-------------------------------|----------------------|----|----------------|------------|-------------|------|
| Intercept                     | 106.87               | 1  | 3.00           | 100.64     | 113.11      |      |
| A-Mr                          | -20.33               | 1  | 1.08           | -22.58     | -18.07      | 1.00 |
| A <sup>2</sup>                | -28.61               | 1  | 3.71           | -36.32     | -20.90      | 3.89 |
| B <sup>2</sup>                | -15.08               | 1  | 3.66           | -22.69     | -7.46       | 3.00 |
| A <sup>2</sup> B              | -3.03                | 1  | 1.33           | -5.80      | -0.26       | 1.04 |
| A <sup>2</sup> B <sup>2</sup> | 21.86                | 1  | 4.51           | 12.48      | 31.24       | 5.89 |

*Table S4. Variance table for NG size (nm)*

| Source                        | Sum of Squares | df | Mean Square | F-value | p-value  |             |
|-------------------------------|----------------|----|-------------|---------|----------|-------------|
| <b>Model</b>                  | 2.081E+05      | 8  | 26015.04    | 62.86   | < 0.0001 | significant |
| A-Mr                          | 25963.65       | 1  | 25963.65    | 62.74   | < 0.0001 | ***         |
| B-Qd/Qc                       | 35898.14       | 1  | 35898.14    | 86.74   | < 0.0001 | ***         |
| AB                            | 1792.67        | 1  | 1792.67     | 4.33    | 0.0538   | .           |
| A <sup>2</sup>                | 3417.99        | 1  | 3417.99     | 8.26    | 0.0110   | *           |
| B <sup>2</sup>                | 204.60         | 1  | 204.60      | 0.4944  | 0.4921   |             |
| A <sup>2</sup> B              | 2548.06        | 1  | 2548.06     | 6.16    | 0.0246   | *           |
| AB <sup>2</sup>               | 15246.08       | 1  | 15246.08    | 36.84   | < 0.0001 | ***         |
| A <sup>2</sup> B <sup>2</sup> | 9197.32        | 1  | 9197.32     | 22.22   | 0.0002   | ***         |
| <b>Pure Error</b>             | 6621.75        | 16 | 413.86      |         |          |             |
| <b>Cor Total</b>              | 2.147E+05      | 24 |             |         |          |             |

*Table S5. Coefficients table for NG size (nm)*

| Factor | Coefficient Estimate | df | Standard Error | 95% CI Low | 95% CI High | VIF |
|--------|----------------------|----|----------------|------------|-------------|-----|
|--------|----------------------|----|----------------|------------|-------------|-----|

|                               |         |   |       |         |        |      |
|-------------------------------|---------|---|-------|---------|--------|------|
| Intercept                     | 273.44  | 1 | 13.62 | 244.57  | 302.30 |      |
| A-Mr                          | -92.48  | 1 | 11.68 | -117.24 | -67.73 | 5.27 |
| B-Qd/Qc                       | 77.35   | 1 | 8.31  | 59.74   | 94.96  | 3.09 |
| AB                            | -12.22  | 1 | 5.87  | -24.67  | 0.22   | 1.04 |
| A <sup>2</sup>                | 51.55   | 1 | 17.94 | 13.52   | 89.57  | 4.48 |
| B <sup>2</sup>                | -11.59  | 1 | 16.48 | -46.52  | 23.35  | 2.61 |
| A <sup>2</sup> B              | 25.24   | 1 | 10.17 | 3.68    | 46.80  | 3.09 |
| AB <sup>2</sup>               | 81.31   | 1 | 13.40 | 52.91   | 109.70 | 5.22 |
| A <sup>2</sup> B <sup>2</sup> | -100.12 | 1 | 21.24 | -145.14 | -55.10 | 6.38 |

*Table S6. Variance table for NG PDI (-)*

| Source           | Sum of Squares | df | Mean Square | F-value | p-value  |                 |
|------------------|----------------|----|-------------|---------|----------|-----------------|
| <b>Model</b>     | 0.0213         | 4  | 0.0053      | 21.27   | < 0.0001 | significant     |
| A-Mr             | 0.0020         | 1  | 0.0020      | 8.08    | 0.0101   | *               |
| B-Qd/Qc          | 0.0161         | 1  | 0.0161      | 64.38   | < 0.0001 | ***             |
| AB               | 0.0016         | 1  | 0.0016      | 6.52    | 0.0189   | *               |
| B <sup>2</sup>   | 0.0031         | 1  | 0.0031      | 12.26   | 0.0022   | **              |
| <b>Residual</b>  | 0.0050         | 20 | 0.0002      |         |          |                 |
| Lack of Fit      | 0.0016         | 4  | 0.0004      | 1.85    | 0.1692   | not significant |
| Pure Error       | 0.0034         | 16 | 0.0002      |         |          |                 |
| <b>Cor Total</b> | 0.0263         | 24 |             |         |          |                 |

*Table S7. Coefficients table for NG PDI (-)*

| Factor         | Coefficient Estimate | df | Standard Error | 95% CI Low | 95% CI High | VIF  |
|----------------|----------------------|----|----------------|------------|-------------|------|
| Intercept      | 0.0150               | 1  | 0.0069         | 0.0007     | 0.0294      |      |
| A-Mr           | -0.0113              | 1  | 0.0040         | -0.0196    | -0.0030     | 1.01 |
| B-Qd/Qc        | -0.0299              | 1  | 0.0037         | -0.0377    | -0.0221     | 1.03 |
| AB             | 0.0115               | 1  | 0.0045         | 0.0021     | 0.0209      | 1.01 |
| B <sup>2</sup> | 0.0282               | 1  | 0.0080         | 0.0114     | 0.0449      | 1.03 |

*Table S8. Variance table for  $\chi_{LPEI}$  (-)*

| Source           | Sum of Squares | df | Mean Square | F-value | p-value |             |
|------------------|----------------|----|-------------|---------|---------|-------------|
| <b>Model</b>     | 0.0211         | 2  | 0.0105      | 36.19   | 0.0004  | significant |
| A-Mr             | 0.0192         | 1  | 0.0192      | 65.96   | 0.0002  | ***         |
| A <sup>2</sup>   | 0.0019         | 1  | 0.0019      | 6.42    | 0.0444  | *           |
| <b>Residual</b>  | 0.0017         | 6  | 0.0003      |         |         |             |
| <b>Cor Total</b> | 0.0228         | 8  |             |         |         |             |

*Table S9. Coefficients table for  $\chi_{LPEI}$  (-)*

| Factor         | Coefficient Estimate | df | Standard Error | 95% CI Low | 95% CI High | VIF  |
|----------------|----------------------|----|----------------|------------|-------------|------|
| Intercept      | 0.8266               | 1  | 0.0099         | 0.8025     | 0.8507      |      |
| A-Mr           | 0.0566               | 1  | 0.0070         | 0.0395     | 0.0736      | 1.00 |
| A <sup>2</sup> | -0.0306              | 1  | 0.0121         | -0.0601    | -0.0011     | 1.00 |

*Table S10. Variance table for  $M_{\infty}$  (%)*

| Source                        | Sum of Squares | df | Mean Square | F-value | p-value  |                 |
|-------------------------------|----------------|----|-------------|---------|----------|-----------------|
| <b>Model</b>                  | 0.0002         | 5  | 0.0000      | 34.91   | < 0.0001 | significant     |
| A-Mr                          | 0.0000         | 1  | 0.0000      | 32.70   | < 0.0001 | ***             |
| B-Qd/Qc                       | 0.0000         | 1  | 0.0000      | 38.82   | < 0.0001 | ***             |
| A <sup>2</sup> B              | 0.0001         | 1  | 0.0001      | 67.27   | < 0.0001 | ***             |
| AB <sup>2</sup>               | 0.0000         | 1  | 0.0000      | 18.31   | 0.0004   | ***             |
| A <sup>2</sup> B <sup>2</sup> | 0.0001         | 1  | 0.0001      | 74.63   | < 0.0001 | ***             |
| <b>Residual</b>               | 0.0000         | 20 | 1.247E-06   |         |          |                 |
| Lack of Fit                   | 4.998E-06      | 3  | 1.666E-06   | 1.42    | 0.2716   | not significant |
| Pure Error                    | 0.0000         | 17 | 1.173E-06   |         |          |                 |
| <b>Cor Total</b>              | 0.0002         | 25 |             |         |          |                 |

*Table S11. Coefficients table for  $M_{\infty}$  (%)*

| Factor                        | Coefficient Estimate | df | Standard Error | 95% CI Low | 95% CI High | VIF  |
|-------------------------------|----------------------|----|----------------|------------|-------------|------|
| Intercept                     | 0.0181               | 1  | 0.0003         | 0.0175     | 0.0188      |      |
| A-Mr                          | -0.0029              | 1  | 0.0005         | -0.0040    | -0.0019     | 3.60 |
| B-Qd/Qc                       | -0.0028              | 1  | 0.0004         | -0.0037    | -0.0019     | 2.85 |
| A <sup>2</sup> B              | 0.0045               | 1  | 0.0006         | 0.0034     | 0.0057      | 2.85 |
| AB <sup>2</sup>               | 0.0027               | 1  | 0.0006         | 0.0014     | 0.0041      | 3.62 |
| A <sup>2</sup> B <sup>2</sup> | -0.0041              | 1  | 0.0005         | -0.0050    | -0.0031     | 1.04 |

*Table S12. Variance table for cellular uptake (a.u.)*

| Source                        | Sum of Squares | df | Mean Square | F-value | p-value  |                 |
|-------------------------------|----------------|----|-------------|---------|----------|-----------------|
| <b>Model</b>                  | 22.11          | 6  | 3.68        | 252.57  | < 0.0001 | significant     |
| A-Mr                          | 12.79          | 1  | 12.79       | 876.33  | < 0.0001 | ***             |
| AB                            | 0.2721         | 1  | 0.2721      | 18.65   | 0.0003   | ***             |
| A <sup>2</sup>                | 4.86           | 1  | 4.86        | 332.85  | < 0.0001 | ***             |
| B <sup>2</sup>                | 1.09           | 1  | 1.09        | 74.57   | < 0.0001 | ***             |
| AB <sup>2</sup>               | 5.66           | 1  | 5.66        | 388.21  | < 0.0001 | ***             |
| A <sup>2</sup> B <sup>2</sup> | 2.84           | 1  | 2.84        | 194.49  | < 0.0001 | ***             |
| <b>Residual</b>               | 0.2918         | 20 | 0.0146      |         |          |                 |
| Lack of Fit                   | 0.0034         | 2  | 0.0017      | 0.1051  | 0.9008   | not significant |
| Pure Error                    | 0.2884         | 18 | 0.0160      |         |          |                 |
| <b>Cor Total</b>              | 22.40          | 26 |             |         |          |                 |

*Table S13. Coefficients table for cellular uptake (%)*

| Factor                        | Coefficient Estimate | df | Standard Error | 95% CI Low | 95% CI High | VIF  |
|-------------------------------|----------------------|----|----------------|------------|-------------|------|
| Intercept                     | 2.21                 | 1  | 0.0787         | 2.04       | 2.37        |      |
| A-Mr                          | -1.69                | 1  | 0.0572         | -1.81      | -1.57       | 4.03 |
| AB                            | 0.1506               | 1  | 0.0349         | 0.0779     | 0.22        | 1.06 |
| A <sup>2</sup>                | 1.76                 | 1  | 0.0964         | 1.56       | 1.96        | 3.82 |
| B <sup>2</sup>                | 0.8298               | 1  | 0.0961         | 0.6293     | 1.03        | 3.00 |
| AB <sup>2</sup>               | 1.36                 | 1  | 0.0692         | 1.22       | 1.51        | 3.96 |
| A <sup>2</sup> B <sup>2</sup> | -1.64                | 1  | 0.1177         | -1.89      | -1.40       | 5.82 |

*Table S14. Variance table for NE (%)*

| Source           | Sum of Squares | df | Mean Square | F-value | p-value  |             |
|------------------|----------------|----|-------------|---------|----------|-------------|
| <b>Model</b>     | 85217.56       | 5  | 17043.51    | 69.03   | < 0.0001 | significant |
| A-Mr             | 2355.43        | 1  | 2355.43     | 9.54    | 0.0056   | **          |
| B-Qd/Qc          | 16280.01       | 1  | 16280.01    | 65.93   | < 0.0001 | ***         |
| AB               | 3340.47        | 1  | 3340.47     | 13.53   | 0.0014   | **          |
| A <sup>2</sup>   | 337.93         | 1  | 337.93      | 1.37    | 0.2552   |             |
| A <sup>2</sup> B | 1549.78        | 1  | 1549.78     | 6.28    | 0.0205   | *           |
| <b>Residual</b>  | 5185.18        | 21 | 246.91      |         |          |             |
| Lack of Fit      | 1884.92        | 3  | 628.31      | 3.43    | 0.0394   | significant |
| Pure Error       | 3300.26        | 18 | 183.35      |         |          |             |
| <b>Cor Total</b> | 90402.74       | 26 |             |         |          |             |

*Table S15. Coefficients table for NE (%)*

| Factor           | Coefficient Estimate | df | Standard Error | 95% CI Low | 95% CI High | VIF  |
|------------------|----------------------|----|----------------|------------|-------------|------|
| Intercept        | 106.85               | 1  | 5.28           | 95.86      | 117.84      |      |
| A-Mr             | -11.54               | 1  | 3.74           | -19.31     | -3.77       | 1.02 |
| B-Qd/Qc          | -51.15               | 1  | 6.30           | -64.25     | -38.05      | 3.00 |
| AB               | 16.38                | 1  | 4.45           | 7.12       | 25.65       | 1.02 |
| A <sup>2</sup>   | 7.57                 | 1  | 6.47           | -5.89      | 21.03       | 1.02 |
| A <sup>2</sup> B | -19.33               | 1  | 7.72           | -35.37     | -3.28       | 3.02 |
